# Supplementary material
Source: PubMed Central journal article supplement (PMC3465450)
Supplement: 1209920109_pnas.201209920SI.pdf [file 1209920109_pnas.201209920SI.pdf]

# Supporting Information

Galindo-Villegas et al. 10.1073/pnas.1209920109

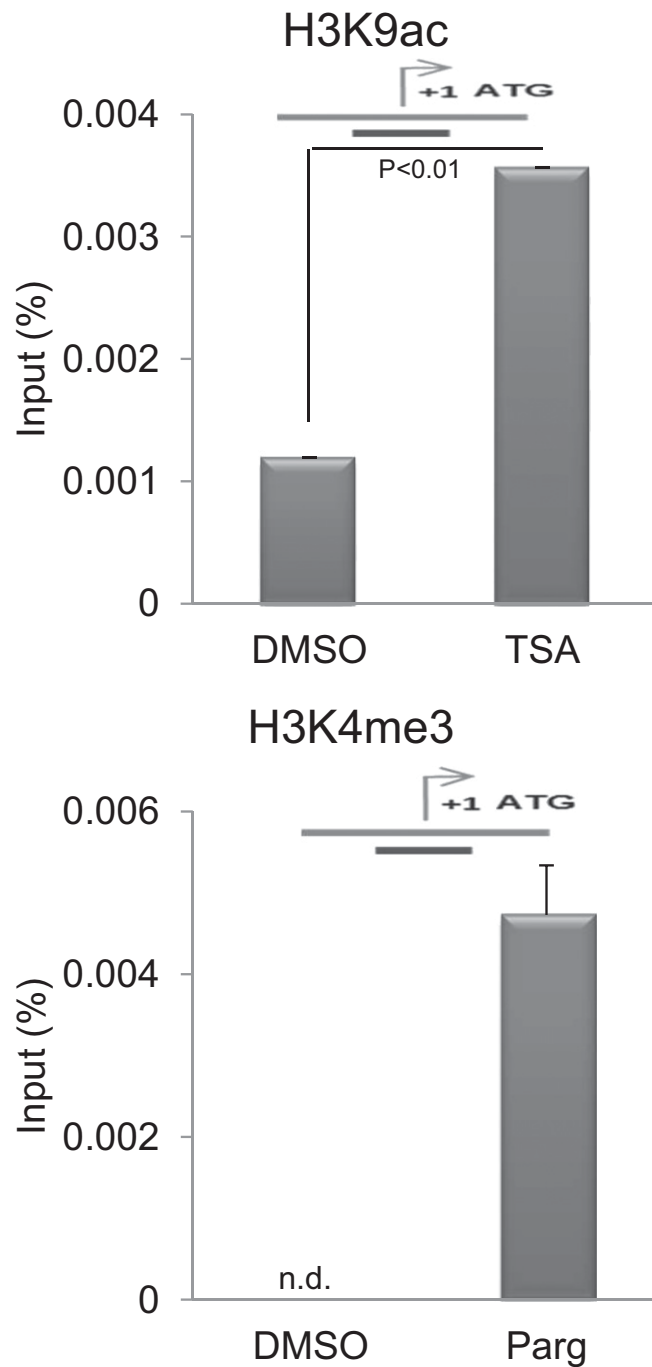

**Fig. S1.** Trichostatin A (TSA) and pargyline regulate chromatin modifications at the IL-1 $\beta$  promoter. Zebrafish eggs microinjected at the one-cell stage with 5–10 ng *Vibrio anguillarum* DNA (vDNA) per egg were dechorionated at 24 h post fertilization (hpf) and treated manually with 100 nM TSA or 3  $\mu$ M pargyline for 5 h. Larvae then were processed and analyzed by ChIP (H3K9ac and H3K4me3). The amplicon used for each promoter is indicated by a diagram above the bars. Error bars indicate the SD of triplicate samples using 30 pooled larvae per treatment. n.d., not detected.



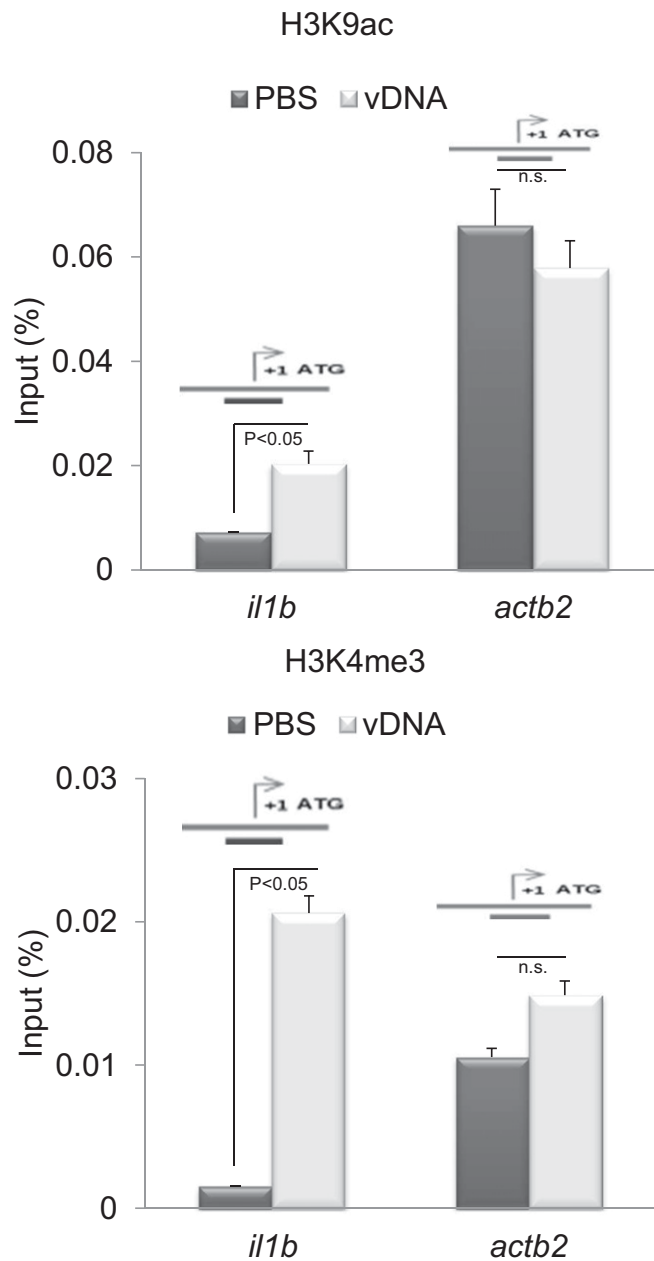

**Fig. 54.** vDNA injection increases chromatin modifications at the IL-1 $\beta$  gene promoter. Zebrafish eggs microinjected at the one-cell stage with 5–10 ng vDNA per egg were processed at 30 hpf and analyzed by ChIP (H3K9ac and H3K4me3). The amplicon used for each promoter is indicated by a diagram above the bars. Error bars indicate the SD of triplicate samples using 30 pooled larvae per sample. n.s., nonsignificant.

**Table S1. Primers used to analyze gene expression in this study**

| Gene symbol     | GenBank accession no. | Gene name                                                      | Primers  | Sequence (5' to 3')                           |
|-----------------|-----------------------|----------------------------------------------------------------|----------|-----------------------------------------------|
| <i>c3a</i>      | BC055564              | <i>Complement component c3a</i>                                | F<br>R   | ATGAGCTCCTGCAGAGGTGT<br>AGTGGTTGTTGGAGGTCTGG  |
| <i>cclc25ab</i> | NM_001129894          | <i>C-C motif chemokine c25 ab</i>                              | F<br>R   | AGCACCTCTCGCTTTGTGTT<br>TGTTTGAAGGCACTTGACG   |
| <i>defbl1</i>   | NM_001081553          | <i>Defensin, beta-like 1</i>                                   | F<br>R   | CAGGACTGCCATCATCTGAA<br>CTCCTTGTCTGCAAAACCA   |
| <i>ifnphi1</i>  | NM_207640             | <i>IFN phi 1</i>                                               | F3<br>R3 | GAGCATGAACCTCGGTGAA<br>TGCGTATCTTGCCACACATT   |
| <i>ifnphi2</i>  | NM_001111082          | <i>IFN phi 2</i>                                               | F1<br>R1 | CCTCTTTGCCAACGACAGTT<br>CGGTTCCCTGAGCTCTCATC  |
| <i>ifnphi3</i>  | NM_001111083          | <i>IFN phi 3</i>                                               | F1<br>R1 | TTCTGCTTTGTGCAGGTTTG<br>GGTATAGAAACGCGGTCTGTC |
| <i>il1b</i>     | NM_212844             | <i>Interleukin 1 beta</i>                                      | F5<br>R5 | GGCTGTGTGTTTGGGAATCT<br>TGATAAACCAACCGGGACA   |
| <i>il8</i>      | CT826376              | <i>Interleukin 8</i>                                           | F<br>R   | GTCGCTGCATTGAAACAGAA<br>CTTAACCCATGGAGCAGAGG  |
| <i>il8l2</i>    | EH441857              | <i>Interleukin 8-like 2</i>                                    | F<br>R   | GCTGGATCACACTGCAGAAA<br>TGCTGCAAACCTTTCCCTTGA |
| <i>il10</i>     | NM_001020785          | <i>Interleukin 10</i>                                          | F2<br>R2 | ATTTGTGGAGGGCTTTCCCTT<br>AGAGCTGTTGGCAGAATGGT |
| <i>il12a</i>    | AB183001              | <i>Interleukin 12a</i>                                         | F1<br>R1 | AGCAGGACTGTTTGTGCTGGT<br>TCCACTGCGCTGAAGTTAGA |
| <i>lta</i>      | NM_001024821.1        | <i>Lymphotoxin alpha (TNF superfamily, member 1)</i>           | F2<br>R2 | AAGCCAAACGAAGGTCA<br>AACCCATTTTCAGCGATTGTC    |
| <i>lyz</i>      | NM_139180             | <i>Lysozyme</i>                                                | F<br>R   | TGGCAGTGGTGTTTTTGTGT<br>TCAAATCCATCAAGCCCTTC  |
| <i>mxb</i>      | NM_001128672          | <i>Myxovirus (influenza) resistance B</i>                      | F1<br>R  | AATGGTGATCCGCTATCTGC<br>TCTGGCGGCTCAGTAAGTTT  |
| <i>mxc</i>      | NM_001007284          | <i>Myxovirus (influenza virus) resistance C</i>                | F<br>R   | GAGGCTTCACTGGCAACTC<br>TTGTTCCAATAAGGCCAAGC   |
| <i>nos2b</i>    | NM_001113501          | <i>Nitric oxide synthase 2b, inducible</i>                     | F1<br>R1 | GGCTTGCACTGCTTTTAAGG<br>TCCAGAGTGCAACTGTCTCTG |
| <i>ptgs1</i>    | NM_153656             | <i>Prostaglandin-endoperoxide synthase 1</i>                   | F<br>R   | TTTTGCTGCTGAGTGTGTCC<br>CGAACACAGATCCCTGGTT   |
| <i>ptgs2b</i>   | NM_001025504          | <i>Prostaglandin-endoperoxide synthase 2b</i>                  | F1<br>R1 | TGGATCTTTCCCTGGTGAAGG<br>GAAGCTCAGGGTGTGTCAG  |
| <i>ticam1</i>   | NM_001044759          | <i>Toll-like receptor adaptor molecule 1</i>                   | F1<br>R1 | ATGGAGAGCGCTTGAACCTGT<br>TTGTGCAACAACTCTCTCTG |
| <i>tlr3</i>     | NM_001013269          | <i>Toll-like receptor 3</i>                                    | F1<br>R1 | AAAGGGTACGTTTGGTGTG<br>GTTGGTGGAGTTCAGCATT    |
| <i>tlr4ba</i>   | NM_001131051          | <i>Toll-like receptor 4b, duplicate a</i>                      | F<br>R   | CAATGGCTTGGTACTTTGTC<br>GATTTGAGGAGTCCCGATA   |
| <i>tlr22</i>    | NM_001128675          | <i>Toll-like receptor 22</i>                                   | F1<br>R1 | TGGGCCAAGAAGAAATGAATC<br>ATGACAACAGGAGGGTGAGG |
| <i>tnfa</i>     | NM_212859             | <i>Tumor necrosis factor alpha (TNF superfamily, member 2)</i> | F2<br>R2 | CGCCTTTTCTGAATCCTACG<br>TGCCAGTCTGCTCCTTCT    |
| <i>rps11</i>    | NM_213377             | <i>Ribosomal protein S11</i>                                   | F<br>R   | ACAGAAATGCCCTTCACTG<br>GCCTTCTCAAAACGGTTG     |

The gene symbols follow the Zebrafish Nomenclature Guidelines (<https://wiki.zfin.org/display/general/ZFIN+Zebrafish+Nomenclature+Guidelines>).
